# Supplementary material for: Using sero-epidemiology to monitor disparities in vaccination and infection with SARS-CoV-2
Source: PubMed Central journal article supplement (PMC9068757; doi:10.1038/s41467-022-30051-x), 2022-05-04
Supplement: 41467_2022_30051_MOESM1_ESM.pdf [file 41467_2022_30051_MOESM1_ESM.pdf]

**Supplementary Figures and Tables for ‘Using sero-epidemiology to monitor disparities in vaccination and infection with SARS-CoV-2’**

**Supplementary Tables**

**Supplementary Table 1: Interpretation of bivariate antibody results on the Vitros and Roche assays.** Table showing the sample sizes and results of each antibody assay, including samples removed due to false positive/negative or inconclusive results.

| <b>Vitros result</b> | <b>Roche result</b> | <b>Interpretation for bivariate analyses (n)</b>                       |
|----------------------|---------------------|------------------------------------------------------------------------|
| Positive             | Positive            | Infected and (either vaccinated or unvaccinated) (n=79)                |
| Positive             | Negative            | Uninfected and vaccinated (n=181)                                      |
| Negative             | Negative            | Uninfected and unvaccinated (n=655)                                    |
| Negative             | Positive            | False negative on Vitros and/or false positive on Roche (n=3; removed) |
| Positive             | No result           | (n=15; removed)                                                        |
| Negative             | No result           | (n=43; removed)                                                        |
| No result            | Positive            | (n=2; removed)                                                         |
| No result            | Negative            | (n=21; removed)                                                        |

**Supplementary Table 2: Bivariate posteriors by ZIP code Tabulation Area (ZCTA).** Table showing the mean posterior probability of vaccination, the mean posterior probability of prior infection, and the 2.5%, 50% and 97.5% quantiles of the posterior for both prior infection and vaccination as well as sample size, stratified by zipcode.

| ZCTA  | Mean, P(vaccination) | Mean, P(infection) | 2.5%, P(vaccination) | 2.5%, P(infection) | 50%, P(vaccination) | 50%, P(infection) | 97.5%, P(vaccination) | 97.5%, P(infection) | N samples |
|-------|----------------------|--------------------|----------------------|--------------------|---------------------|-------------------|-----------------------|---------------------|-----------|
| 94102 | 0.166                | 0.124              | 0.073                | 0.048              | 0.164               | 0.121             | 0.273                 | 0.224               | 36        |
| 94103 | 0.097                | 0.169              | 0.025                | 0.079              | 0.091               | 0.166             | 0.203                 | 0.278               | 31        |
| 94105 | 0.060                | 0.166              | 0.002                | 0.044              | 0.046               | 0.158             | 0.193                 | 0.333               | 13        |
| 94107 | 0.156                | 0.059              | 0.066                | 0.008              | 0.152               | 0.053             | 0.266                 | 0.147               | 28        |
| 94108 | 0.180                | 0.057              | 0.056                | 0.001              | 0.171               | 0.044             | 0.349                 | 0.186               | 12        |
| 94109 | 0.257                | 0.101              | 0.178                | 0.046              | 0.256               | 0.099             | 0.341                 | 0.170               | 65        |
| 94110 | 0.198                | 0.178              | 0.123                | 0.108              | 0.198               | 0.176             | 0.279                 | 0.256               | 75        |
| 94112 | 0.219                | 0.145              | 0.145                | 0.087              | 0.218               | 0.143             | 0.298                 | 0.212               | 86        |
| 94114 | 0.198                | 0.070              | 0.105                | 0.017              | 0.195               | 0.065             | 0.307                 | 0.153               | 38        |
| 94115 | 0.359                | 0.023              | 0.258                | 0.001              | 0.357               | 0.016             | 0.467                 | 0.080               | 39        |
| 94116 | 0.135                | 0.056              | 0.066                | 0.014              | 0.132               | 0.051             | 0.219                 | 0.120               | 48        |
| 94117 | 0.177                | 0.042              | 0.097                | 0.006              | 0.175               | 0.037             | 0.273                 | 0.108               | 41        |
| 94118 | 0.217                | 0.041              | 0.131                | 0.005              | 0.215               | 0.036             | 0.313                 | 0.107               | 43        |
| 94121 | 0.315                | 0.052              | 0.229                | 0.012              | 0.313               | 0.048             | 0.407                 | 0.115               | 53        |
| 94122 | 0.292                | 0.058              | 0.210                | 0.017              | 0.291               | 0.055             | 0.382                 | 0.118               | 65        |
| 94123 | 0.197                | 0.038              | 0.086                | 0.001              | 0.192               | 0.028             | 0.331                 | 0.126               | 21        |
| 94124 | 0.075                | 0.155              | 0.019                | 0.077              | 0.070               | 0.153             | 0.163                 | 0.254               | 40        |
| 94127 | 0.322                | 0.097              | 0.166                | 0.015              | 0.317               | 0.088             | 0.494                 | 0.235               | 17        |
| 94131 | 0.357                | 0.031              | 0.232                | 0.001              | 0.355               | 0.022             | 0.491                 | 0.111               | 28        |
| 94132 | 0.299                | 0.162              | 0.185                | 0.073              | 0.298               | 0.159             | 0.421                 | 0.266               | 40        |
| 94133 | 0.215                | 0.067              | 0.106                | 0.011              | 0.211               | 0.060             | 0.348                 | 0.161               | 25        |
| 94134 | 0.257                | 0.231              | 0.136                | 0.130              | 0.255               | 0.227             | 0.392                 | 0.347               | 36        |

**Supplementary Table 3: Univariate posteriors by demography.** Table showing the univariate mean and the 2.5%,50% and 97.5% quantiles of the posteriors for the assay results, as well as the raw count of positive samples and denominator, stratified by demographic group.

| Assay  | Demographic Group         | Median | CI.2.5% | CI.97.5% | N positive (raw) | N samples with results |
|--------|---------------------------|--------|---------|----------|------------------|------------------------|
| Roche  | 0-17                      | 0.451  | 0.240   | 0.681    | 8                | 20                     |
| Vitros | 0-17                      | 0.518  | 0.291   | 0.767    | 9                | 21                     |
| Roche  | 18-34                     | 0.173  | 0.116   | 0.243    | 23               | 149                    |
| Vitros | 18-34                     | 0.277  | 0.202   | 0.364    | 35               | 151                    |
| Roche  | 35-64                     | 0.101  | 0.074   | 0.136    | 38               | 412                    |
| Vitros | 35-64                     | 0.223  | 0.180   | 0.271    | 79               | 426                    |
| Roche  | 65+                       | 0.043  | 0.024   | 0.070    | 14               | 359                    |
| Vitros | 65+                       | 0.479  | 0.420   | 0.539    | 151              | 377                    |
| Roche  | Asian                     | 0.035  | 0.015   | 0.065    | 8                | 262                    |
| Vitros | Asian                     | 0.331  | 0.269   | 0.399    | 75               | 272                    |
| Roche  | Black or African American | 0.086  | 0.038   | 0.157    | 8                | 108                    |
| Vitros | Black or African American | 0.201  | 0.127   | 0.289    | 18               | 110                    |
| Roche  | Hispanic or Latino        | 0.321  | 0.250   | 0.399    | 47               | 163                    |
| Vitros | Hispanic or Latino        | 0.463  | 0.380   | 0.551    | 67               | 173                    |
| Roche  | Other                     | 0.102  | 0.042   | 0.186    | 7                | 71                     |
| Vitros | Other                     | 0.313  | 0.204   | 0.444    | 19               | 71                     |
| Roche  | White                     | 0.046  | 0.026   | 0.072    | 14               | 337                    |
| Vitros | White                     | 0.328  | 0.270   | 0.387    | 96               | 350                    |

**Supplementary Table 4: Bivariate antibody results by age and race/ethnicity.** Table showing probability of vaccination given infected, probability of vaccination given uninfected, probability of infection, probability of vaccination, probability of vaccination divided by probability of infection (“risk ratio”), and relative risk ratio with a reference group of White race/ethnicity and the corresponding age.

| Age   | Race/Ethnicity | parameter                | median | lb_2.5 | ub_97.5 |
|-------|----------------|--------------------------|--------|--------|---------|
| 18-64 | Asian          | p_vacc_given_inf         | 0.216  | 0.008  | 0.875   |
| 18-64 | Black          | p_vacc_given_inf         | 0.303  | 0.012  | 0.932   |
| 18-64 | Latinx         | p_vacc_given_inf         | 0.053  | 0.002  | 0.261   |
| 18-64 | White          | p_vacc_given_inf         | 0.125  | 0.005  | 0.620   |
| 65+   | Asian          | p_vacc_given_inf         | 0.233  | 0.007  | 0.891   |
| 65+   | Black          | p_vacc_given_inf         | 0.387  | 0.015  | 0.958   |
| 65+   | Latinx         | p_vacc_given_inf         | 0.270  | 0.010  | 0.914   |
| 65+   | White          | p_vacc_given_inf         | 0.105  | 0.003  | 0.688   |
| 18-64 | Asian          | p_vacc_given_uninf       | 0.099  | 0.065  | 0.137   |
| 18-64 | Black          | p_vacc_given_uninf       | 0.074  | 0.036  | 0.124   |
| 18-64 | Latinx         | p_vacc_given_uninf       | 0.086  | 0.045  | 0.141   |
| 18-64 | White          | p_vacc_given_uninf       | 0.078  | 0.052  | 0.108   |
| 65+   | Asian          | p_vacc_given_uninf       | 0.294  | 0.245  | 0.344   |
| 65+   | Black          | p_vacc_given_uninf       | 0.130  | 0.054  | 0.241   |
| 65+   | Latinx         | p_vacc_given_uninf       | 0.285  | 0.168  | 0.420   |
| 65+   | White          | p_vacc_given_uninf       | 0.316  | 0.269  | 0.364   |
| 18-64 | Asian          | p_inf                    | 0.046  | 0.019  | 0.086   |
| 18-64 | Black          | p_inf                    | 0.069  | 0.031  | 0.124   |
| 18-64 | Latinx         | p_inf                    | 0.291  | 0.232  | 0.355   |
| 18-64 | White          | p_inf                    | 0.054  | 0.028  | 0.088   |
| 65+   | Asian          | p_inf                    | 0.024  | 0.005  | 0.067   |
| 65+   | Black          | p_inf                    | 0.081  | 0.022  | 0.184   |
| 65+   | Latinx         | p_inf                    | 0.188  | 0.090  | 0.311   |
| 65+   | White          | p_inf                    | 0.046  | 0.016  | 0.096   |
| 18-64 | Asian          | p_vacc                   | 0.106  | 0.072  | 0.147   |
| 18-64 | Black          | p_vacc                   | 0.093  | 0.046  | 0.154   |
| 18-64 | Latinx         | p_vacc                   | 0.080  | 0.042  | 0.145   |
| 18-64 | White          | p_vacc                   | 0.083  | 0.056  | 0.116   |
| 65+   | Asian          | p_vacc                   | 0.292  | 0.244  | 0.343   |
| 65+   | Black          | p_vacc                   | 0.155  | 0.068  | 0.270   |
| 65+   | Latinx         | p_vacc                   | 0.290  | 0.165  | 0.438   |
| 65+   | White          | p_vacc                   | 0.308  | 0.260  | 0.358   |
| 18-64 | Asian          | ratio_p_vacc_p_inf       | 2.314  | 1.016  | 6.304   |
| 18-64 | Black          | ratio_p_vacc_p_inf       | 1.368  | 0.510  | 3.388   |
| 18-64 | Latinx         | ratio_p_vacc_p_inf       | 0.275  | 0.134  | 0.526   |
| 18-64 | White          | ratio_p_vacc_p_inf       | 1.515  | 0.754  | 3.350   |
| 65+   | Asian          | ratio_p_vacc_p_inf       | 12.220 | 4.188  | 55.534  |
| 65+   | Black          | ratio_p_vacc_p_inf       | 1.912  | 0.559  | 7.817   |
| 65+   | Latinx         | ratio_p_vacc_p_inf       | 1.572  | 0.655  | 3.705   |
| 65+   | White          | ratio_p_vacc_p_inf       | 6.676  | 2.930  | 20.444  |
| 18-64 | Asian          | RRR_vs_white_of_that_age | 1.571  | 0.493  | 4.832   |
| 18-64 | Black          | RRR_vs_white_of_that_age | 0.875  | 0.265  | 2.883   |
| 18-64 | Latinx         | RRR_vs_white_of_that_age | 0.184  | 0.064  | 0.495   |
| 18-64 | White          | RRR_vs_white_of_that_age | 1.000  | 1.000  | 1.000   |
| 65+   | Asian          | RRR_vs_white_of_that_age | 1.831  | 0.405  | 9.568   |
| 65+   | Black          | RRR_vs_white_of_that_age | 0.291  | 0.060  | 1.489   |
| 65+   | Latinx         | RRR_vs_white_of_that_age | 0.231  | 0.058  | 0.788   |
| 65+   | White          | RRR_vs_white_of_that_age | 1.000  | 1.000  | 1.000   |

**Supplementary Figures**

**Supplementary Figure 1: Pathways to immunity via infection and vaccination.**

Venn diagram showing the pathways to immunity and associated results on Roche and Vitros assays. The blue portion of the Venn diagram shows underlying vaccination and infection states which lead to a positive result on both Roche and Vitros assays. Green portions of the Venn diagram show vaccination and infection states leading to a positive result on the Vitros and negative result on the Roche assay. Samples can either be A) vaccinated and previously infected, B) vaccinated and previously uninfected, C) unvaccinated and previously infected or D) unvaccinated and previously uninfected.

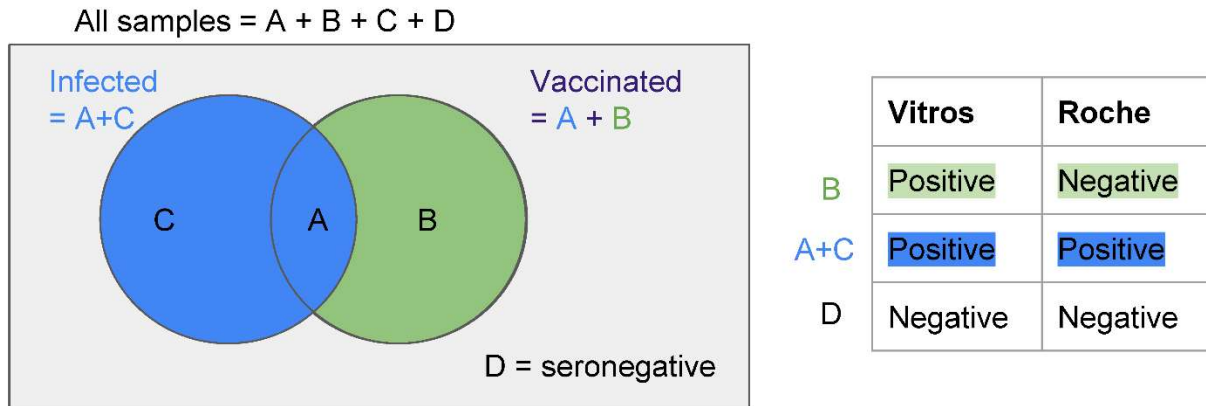

- A= Vaccinated and previously infected
- B = Vaccinated and not previously infected
- C = Not vaccinated and previously infected
- D= No immune response (Negative on both assays)

**Supplementary Figure 2: Geographic disparities in SARS-CoV-2 infection and vaccination by ZIP code in San Francisco, as of February 2021 (univariate). (A) Adjusted seroprevalence on the Roche assay (reflecting natural infection only). (B) Adjusted seroprevalence on the Vitros assay (reflecting both natural infection and/or vaccination). (C) The difference in adjusted seroprevalence on the Vitros and Roche assays (reflecting those who were seropositive by vaccination only).**

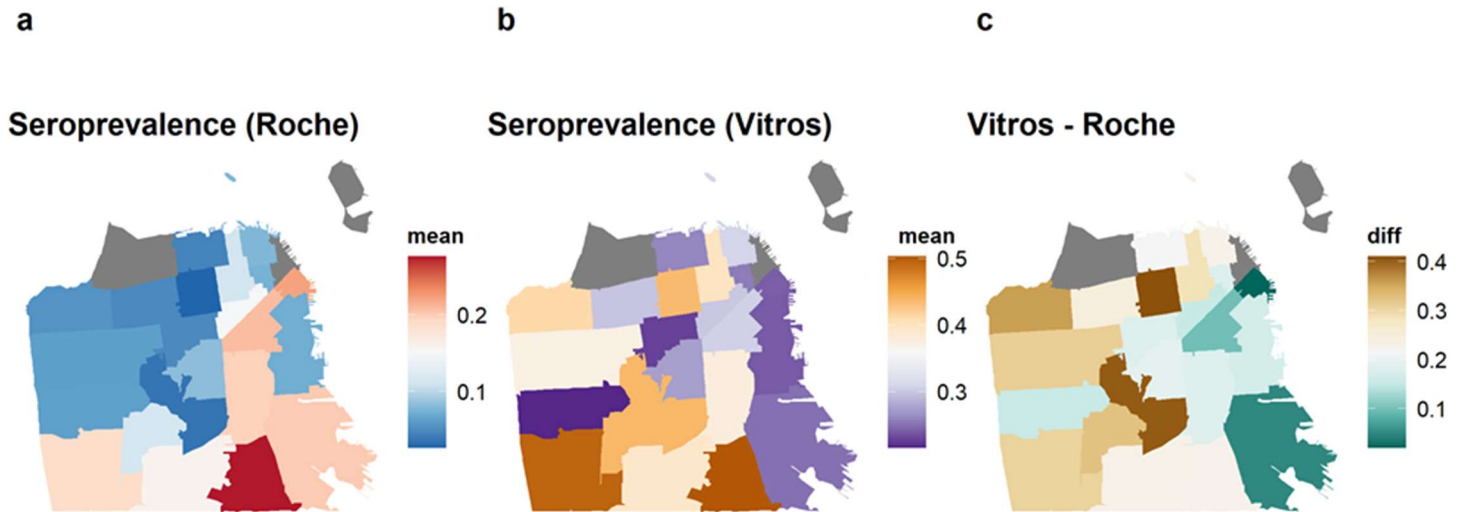

**Supplementary Figure 3: Maps showing distributions of the San Francisco population by race/ethnicity and income.**

Maps showing a) the proportion of the population which identifies as Hispanic/Latinx by zipcode, b) the proportion of the population which identifies as Black/African American by zipcode, and c) the proportion of the population with a household income below the US census defined poverty line by zipcode. All data come from the 2019 American Community Survey 5 year estimates<sup>1</sup>.

**a** Proportion of population which identifies as Hispanic/Latinx

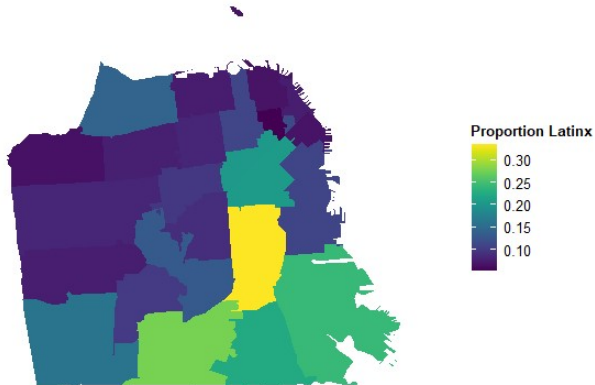

**b** Proportion of population which identifies as Black/ African American

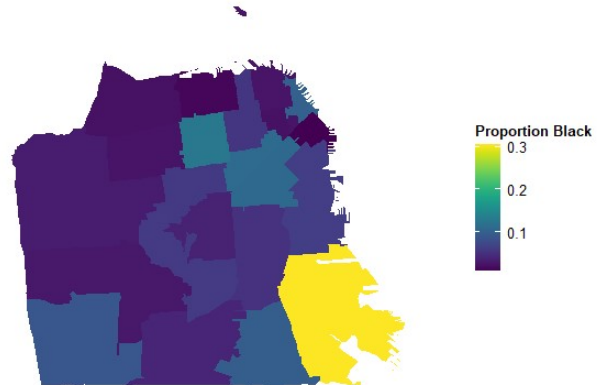

**c** Proportion of population with a household income under the poverty line

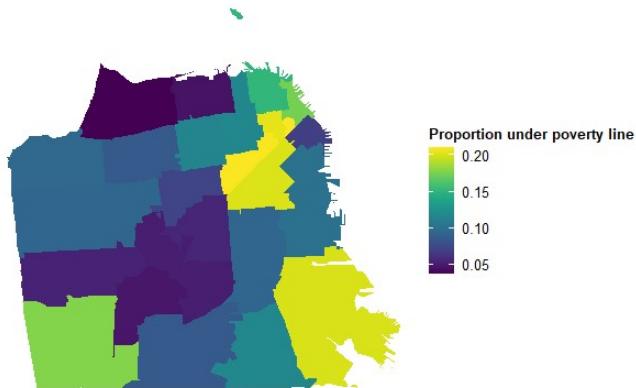

**Supplementary Figure 4: Cumulative proportion of individuals who received the first dose of SARS-CoV-2 vaccine by date, age group, and race/ethnicity.** Sampling period of this study shown in grey box. Data downloaded from: <https://data.sfgov.org/COVID-19/COVID-19-Vaccine-Doses-Given-to-San-Franciscans-by/xjh5-h442>.

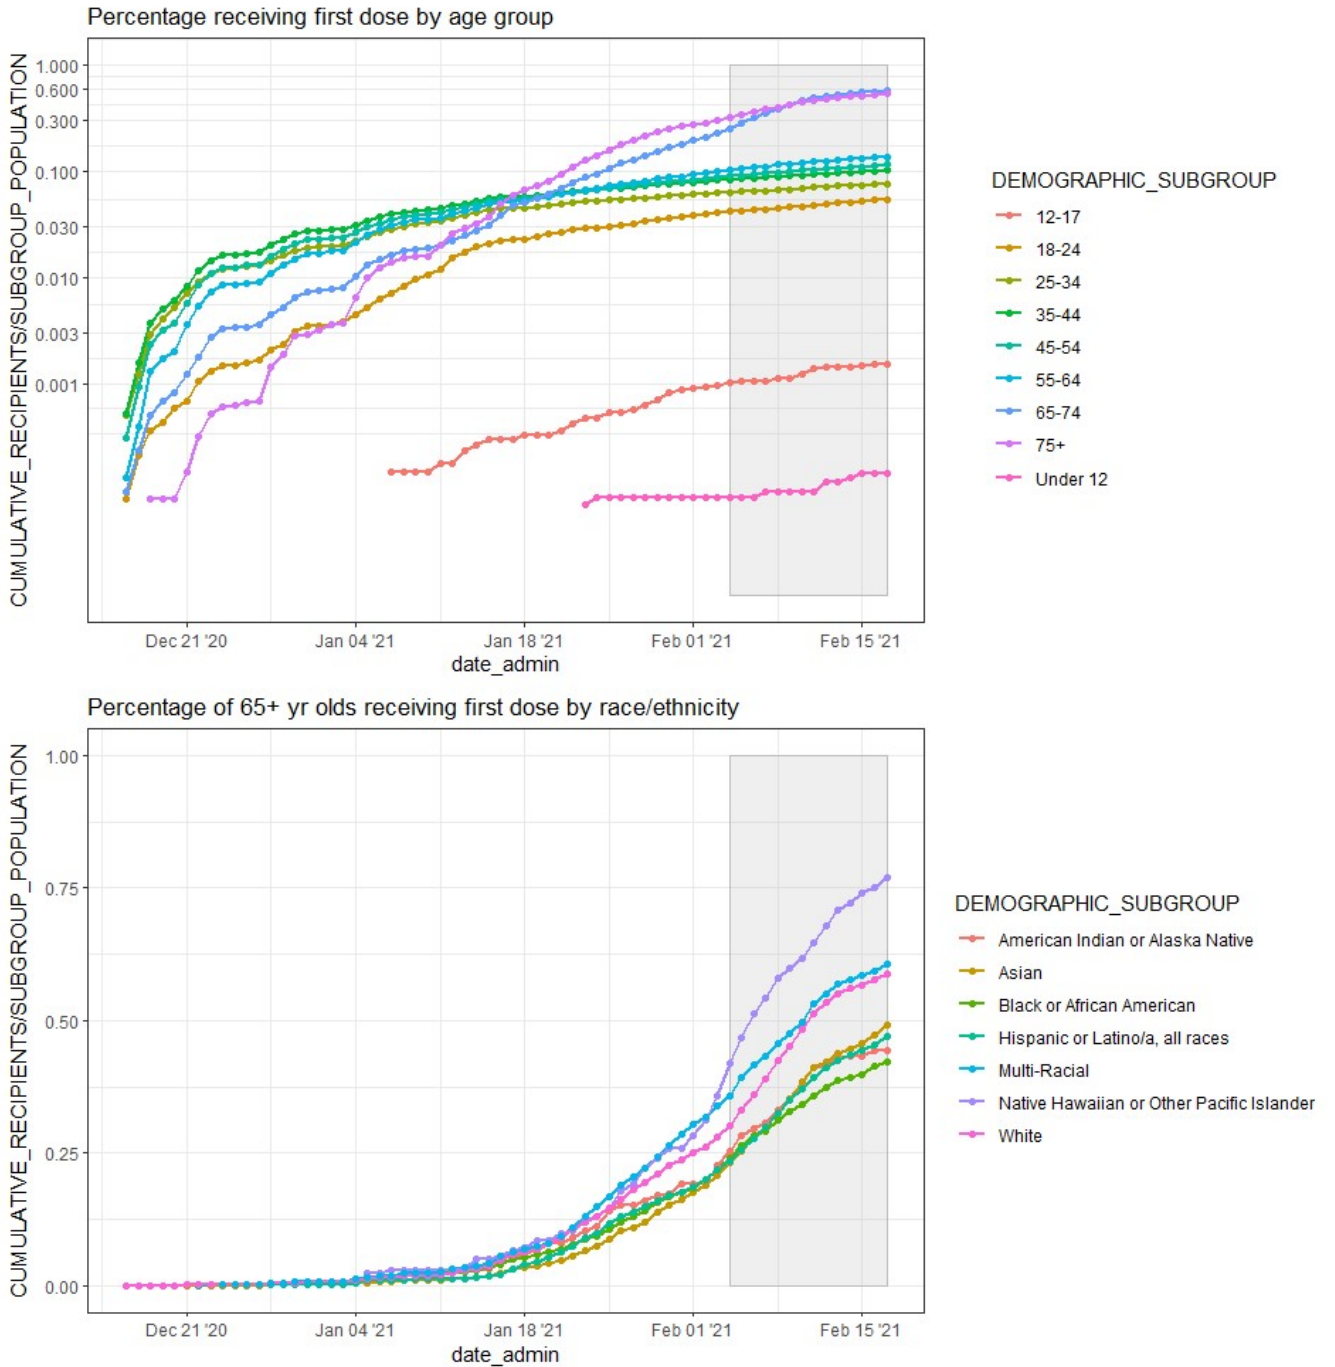



**Supplementary Figure 5: Time series of reported SARS-CoV-2 cases and deaths in San Francisco.** Sampling period of this study shown in red box. Data downloaded from: <https://data.sfgov.org/COVID-19/COVID-19-Cases-Summarized-by-Date-Transmission-and/tvq9-ec9w>.

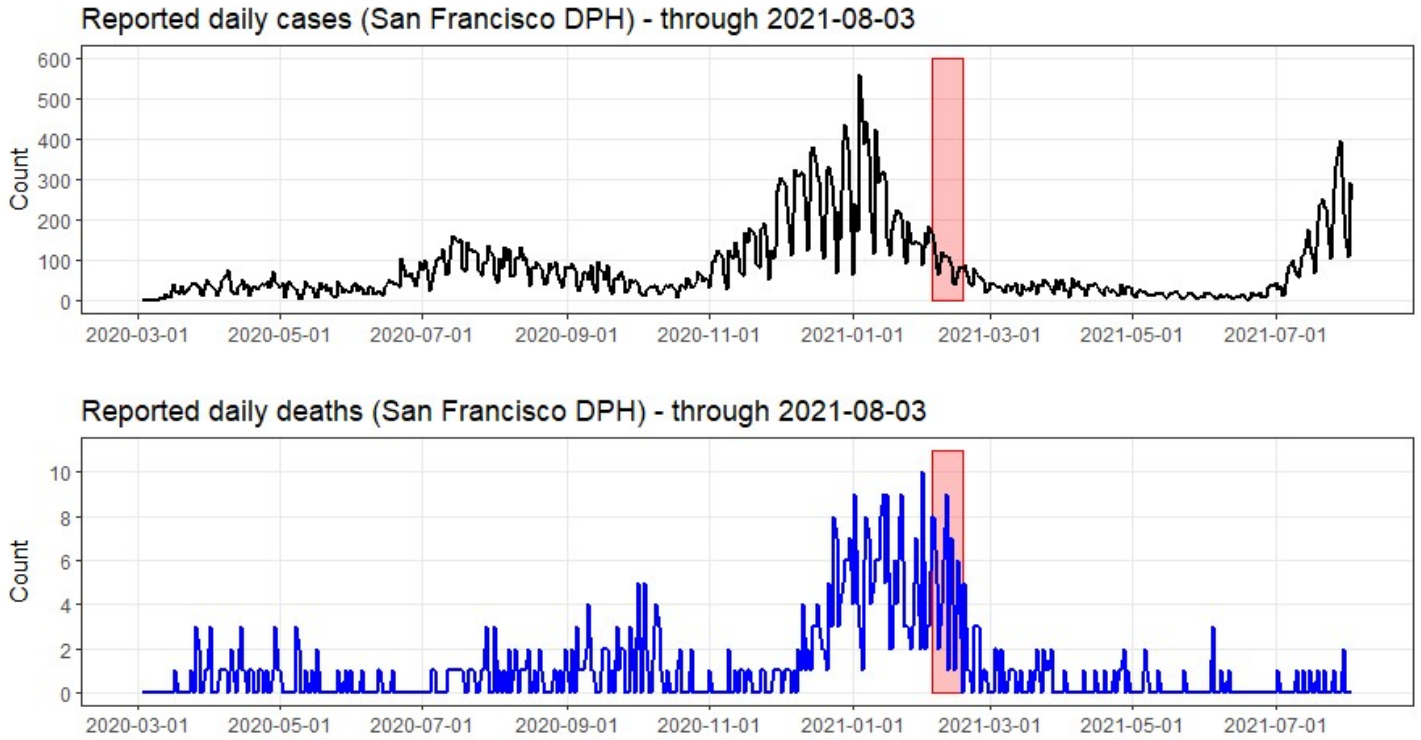

## **Supplementary References**

1. U.S. Census Bureau. 2015-2019 American Community Survey 5-Year Estimates. (2020).
